# Supplementary material for: Pre-clinical efficacy and synergistic potential of the MDM2-p53 antagonists, Nutlin-3 and RG7388, as single agents and in combined treatment with cisplatin in ovarian cancer
Source: PubMed Central journal article supplement (PMC5129997; doi:10.18632/oncotarget.9499), 2016-05-20
Supplement: oncotarget-07-40115-s001.pdf [file oncotarget-07-40115-s001.pdf]

## Pre-clinical efficacy and synergistic potential of the MDM2-p53 antagonists, Nutlin-3 and RG7388, as single agents and in combined treatment with cisplatin in ovarian cancer

### SUPPLEMENTARY FIGURES AND TABLES

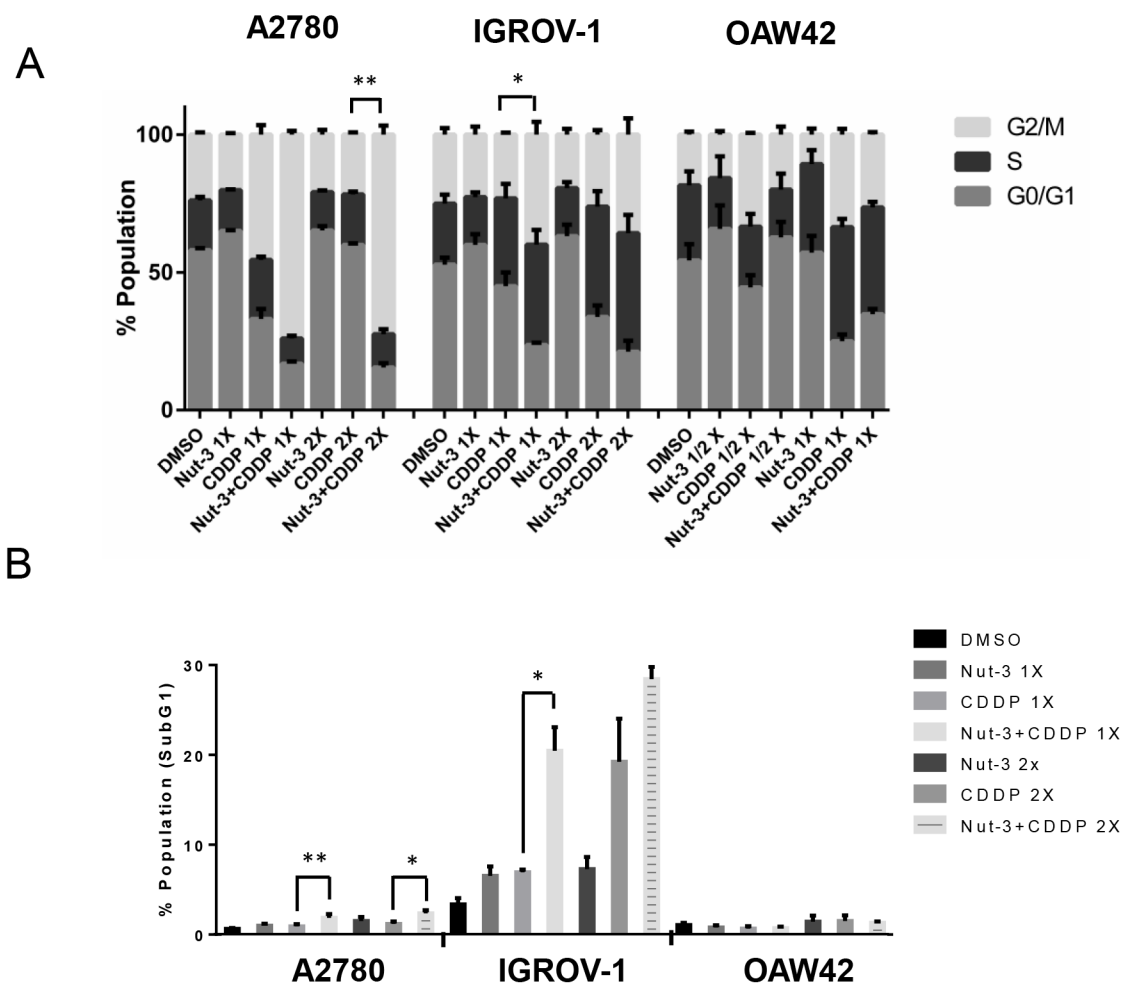

**Supplementary Figure S1: Combination of Nutlin-3 with cisplatin affects the cell cycle distribution and apoptotic endpoints.** Wild-type *TP53* ovarian cancer cells were treated for 48 hours with Nutlin-3 or cisplatin alone and at constant 1:1 combination ratios of 1X and 2X (1/2 X & 1X for OAW42) their respective  $GI_{50}$  concentrations. **A.** Combination of Nutlin-3 with cisplatin led to an increased proportion of cells in G2/M phase compared to either agent alone in A2780 and IGROV-1 cell lines and **B.** FACS analysis for Sub-G1 events. Nut-3, Nutlin-3; CDDP, cisplatin; \*,  $p < 0.05$ ; \*\*,  $P < 0.01$ . Data are shown as the average of at least 3 independent experiments and error bars represent SEM. Statistically significant results were only shown in comparison with cisplatin on its own.

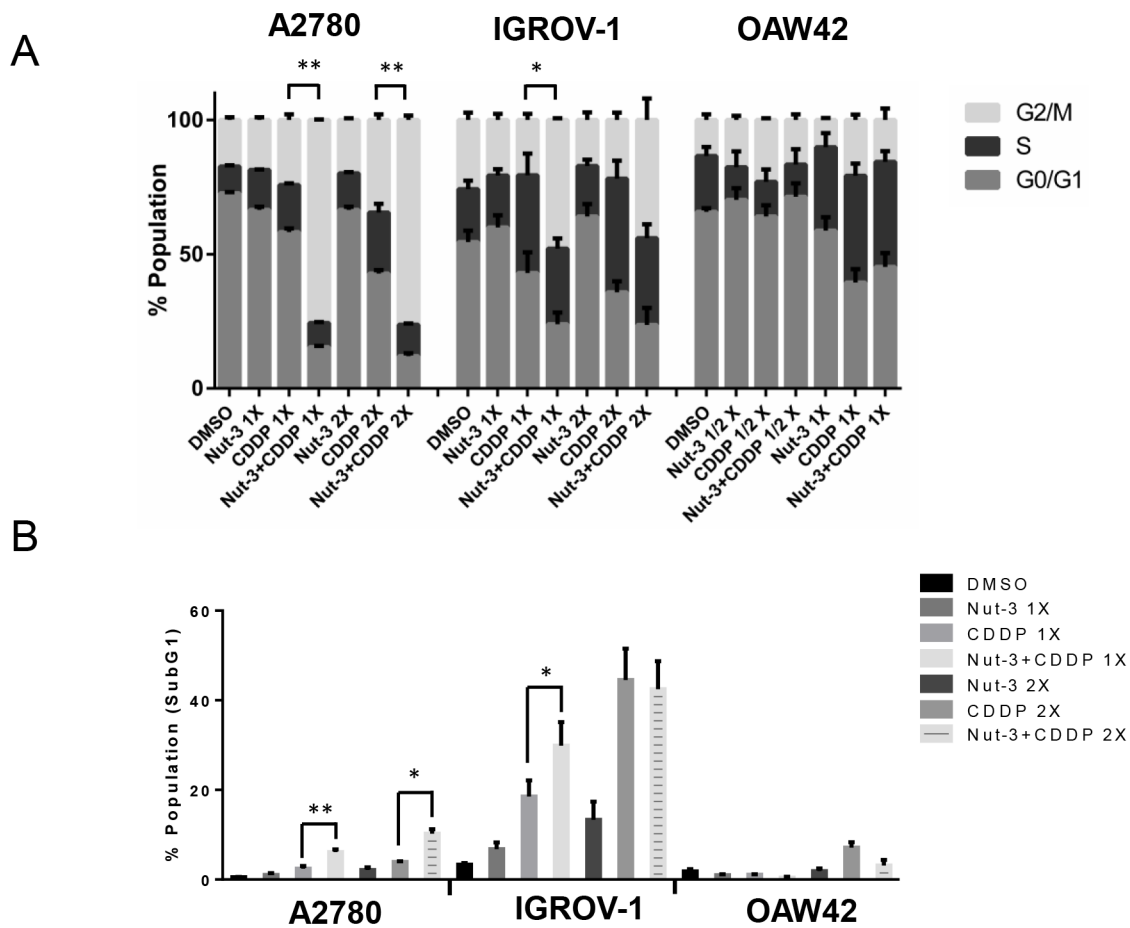

**Supplementary Figure S2: Combination of Nutlin-3 with cisplatin affects the cell cycle distribution and apoptotic endpoints.** Wild-type *TP53* ovarian cancer cells were treated for 72 hours with Nutlin-3 or cisplatin alone and at constant 1:1 combination ratios of 1X and 2X ( 1/2 X & 1X for OAW42) their respective  $GI_{50}$  concentrations. **A.** Combination of Nutlin-3 with cisplatin led to an increased proportion of cells in G2/M phase compared to either agent alone in A2780 and IGROV-1 cell lines and **B.** FACS analysis for Sub-G1 events. Nut-3, Nutlin-3; CDDP, cisplatin; \*,  $p < 0.05$ ; \*\*,  $P < 0.01$ . Data are shown as the average of at least 3 independent experiments and error bars represent SEM. Statistically significant results were only shown in comparison with cisplatin on its own.

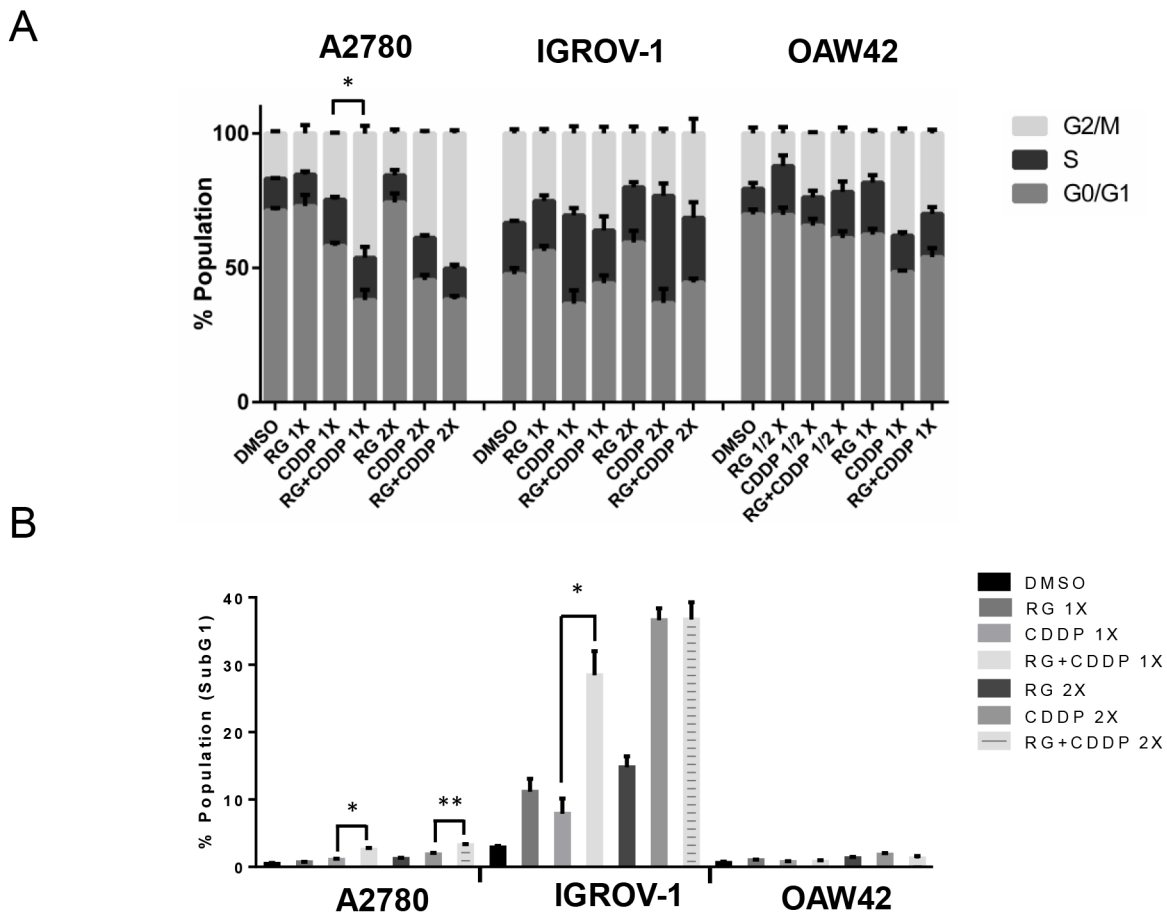

**Supplementary Figure S3: Combination of RG7388 with cisplatin affects the cell cycle distribution and apoptotic endpoints.** Wild-type *TP53* ovarian cancer cells were treated for 48 hours with RG7388 or cisplatin alone and at constant 1:1 combination ratios of 1X and 2X (1/2 X & 1X for OAW42) their respective  $GI_{50}$  concentrations. **A.** Combination of RG7388 with cisplatin led to increased G2/M cell cycle arrest in A2780 and IGROV-1 cell lines and **B.** FACS analysis for Sub-G1 events. RG, RG7388; CDDP, cisplatin; \*,  $p < 0.05$ ; \*\*,  $P < 0.01$ . Data are shown as the average of at least 3 independent experiments and error bars represent SEM. Statistically significant results were only shown in comparison with cisplatin on its own.

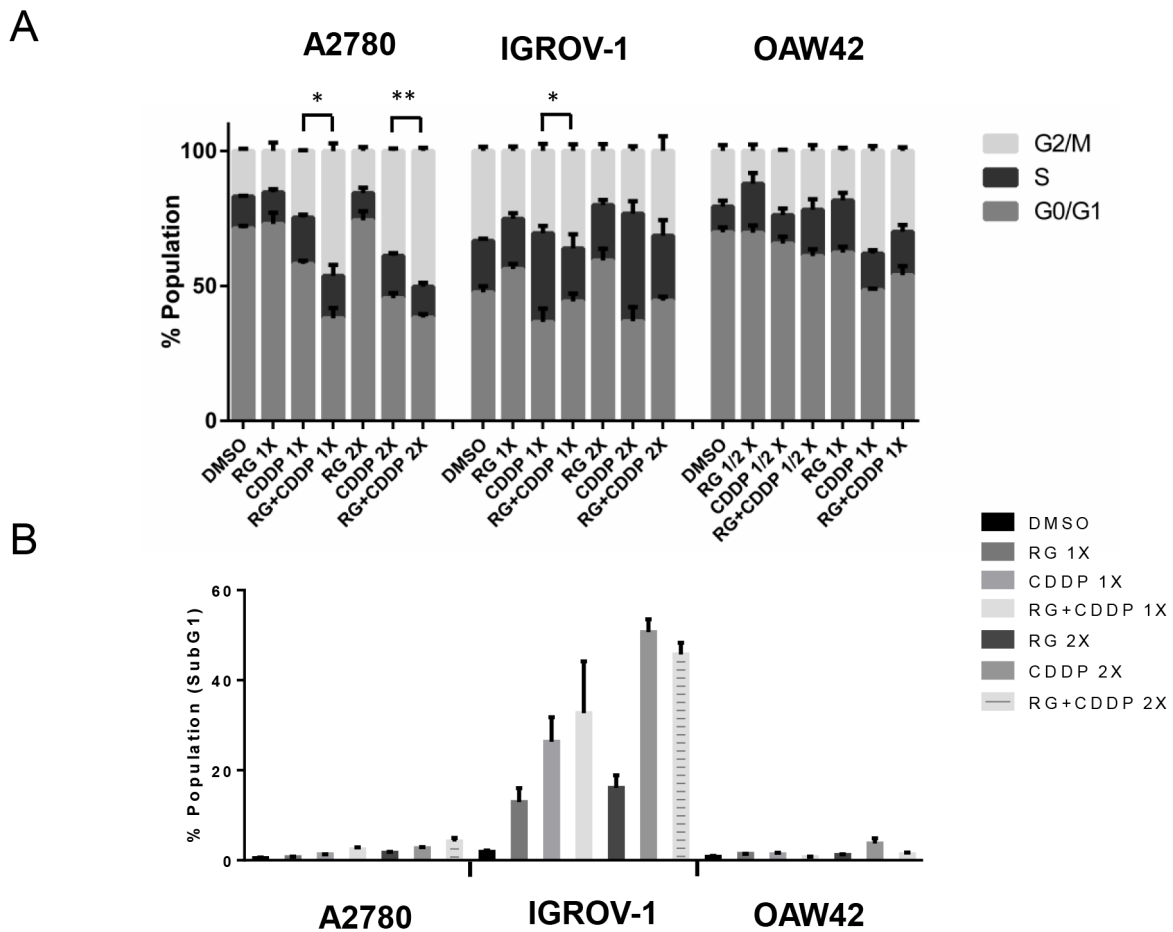

**Supplementary Figure S4: Combination of RG7388 with cisplatin affects the cell cycle distribution and apoptotic endpoints.** Wild-type *TP53* ovarian cancer cells were treated for 72 hours with RG7388 or cisplatin alone and at constant 1:1 combination ratios of 1X and 2X (1/2 X & 1X for OAW42) their respective  $GI_{50}$  concentrations. **A.** Combination of RG7388 with cisplatin led to increased G2/M cell cycle arrest in A2780 and IGROV-1 cell lines and **B.** FACS analysis for Sub-G1 events. RG, RG7388; CDDP, cisplatin; \*,  $p < 0.05$ ; \*\*,  $P < 0.01$ . Data are shown as the average of at least 3 independent experiments and error bars represent SEM. Statistically significant results were only shown in comparison with cisplatin on its own.

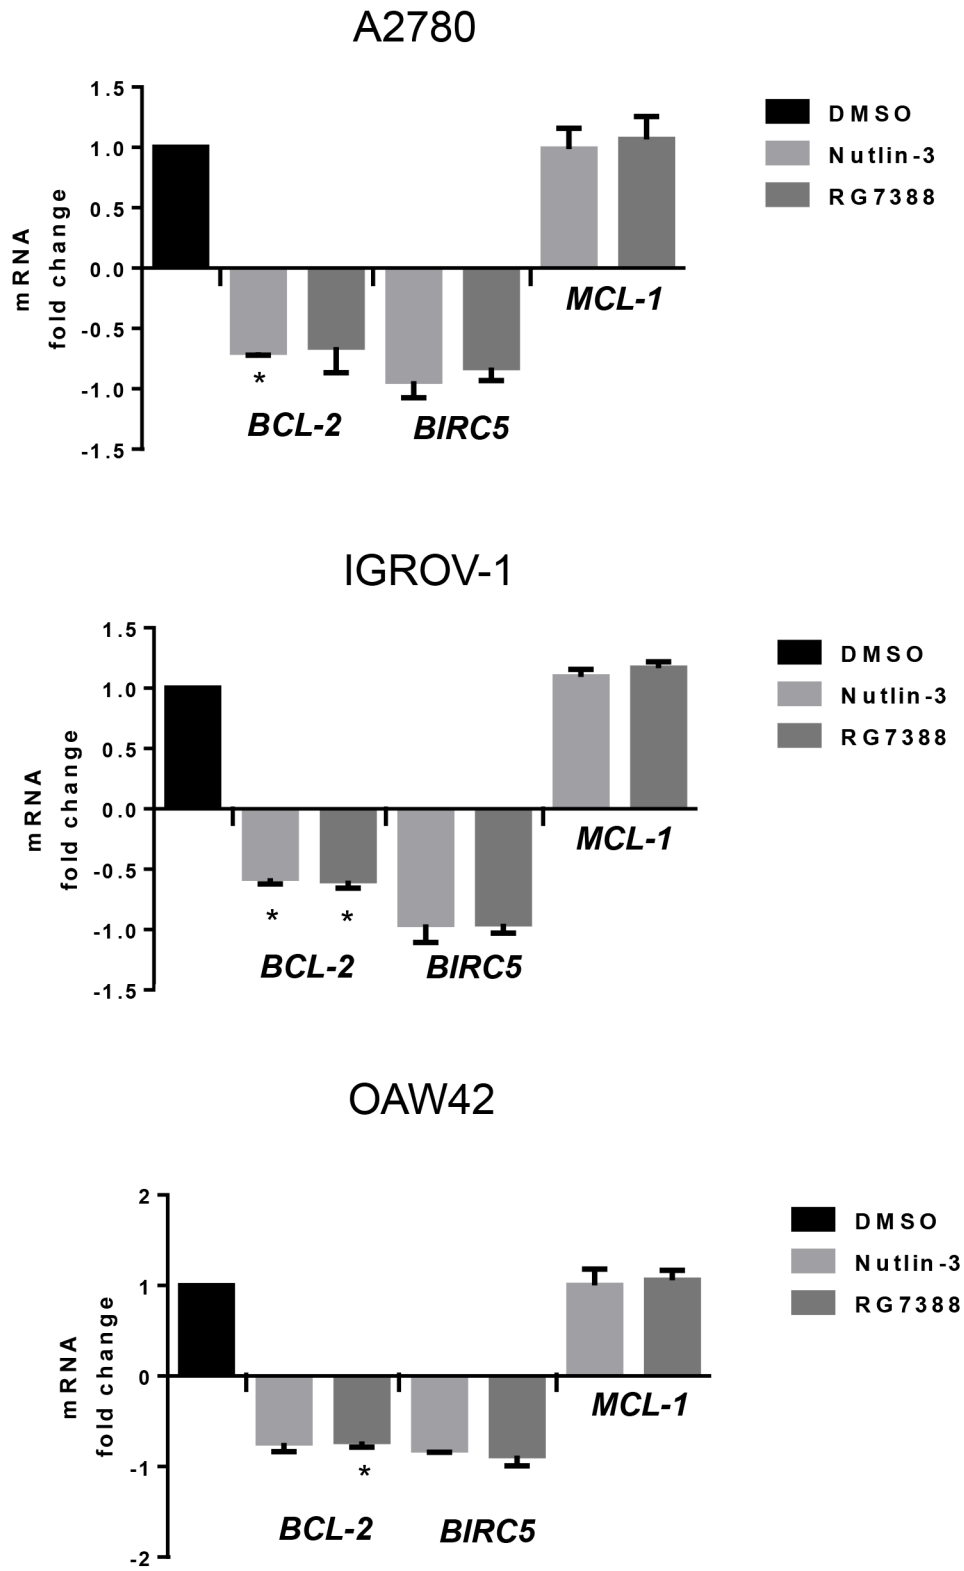

Supplementary Figure S5: mRNA expression of anti-apoptotic genes in response to 5  $\mu$ M Nutlin-3 or 0.5  $\mu$ M RG7388 for 6 hours relative to DMSO solvent control. \*, p < 0.05; \*\*, p < 0.01. Data are presented as mean  $\pm$  standard error of mean (SEM) of three independent repeats.

A

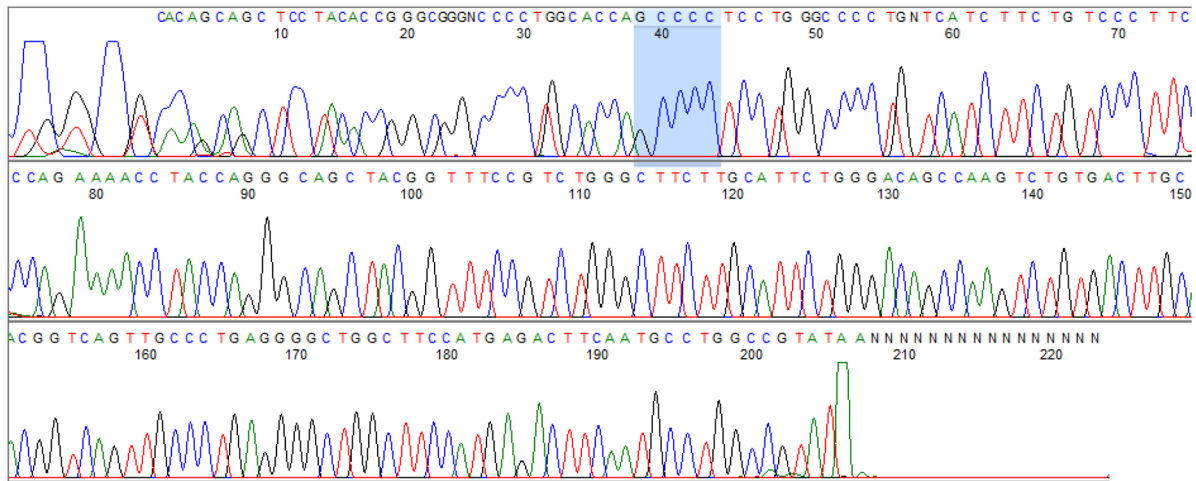

B

Homo sapiens tumor protein p53 (TP53), transcript variant 1, mRNA

Sequence ID: [ref|NM\\_000546.5|](#) Length: 2591 Number of Matches: 1

[▶ See 1 more title\(s\)](#)

Range 1: 439 to 577 [GenBank](#) [Graphics](#)

▼ Next Match ▲ Previous Match

| Score         | Expect                                                      | Identities   | Gaps                           | Strand    |
|---------------|-------------------------------------------------------------|--------------|--------------------------------|-----------|
| 250 bits(135) | 2e-65                                                       | 138/139(99%) | 1/139(0%)                      | Plus/Plus |
| Query 1       | TCCTACACCGGGCGGCCCTGCACCA                                   | S-CCCC       | TCCTGGCCCCCTGTCATCTTCTGTCCCTTC | 59        |
| Sbjct 439     | TCCTACACCGGGCGGCCCTGCACCA                                   | SCCCCC       | TCCTGGCCCCCTGTCATCTTCTGTCCCTTC | 498       |
| Query 60      | CCAGAAAACCTACCAGGGCAGCTACGGTTTCCGTCTGGGCTTCTGCATTCTGGGACAGC |              |                                | 119       |
| Sbjct 499     | CCAGAAAACCTACCAGGGCAGCTACGGTTTCCGTCTGGGCTTCTGCATTCTGGGACAGC |              |                                | 558       |
| Query 120     | CAAGTCTGTGACTTGCACG                                         | 138          |                                |           |
| Sbjct 559     | CAAGTCTGTGACTTGCACG                                         | 577          |                                |           |

**Supplementary Figure S6: Exon4 DNA sequencing of the SKOV-3 cell line.** A. Codon 89 of Exon 4 Cytosine deletion, frame shift (c.265delC, P.pro89fsX33). B. The results of NCBI blast sequence alignment highlighting the deletion.

**Supplementary Table S1: The primers and their sequences used for qRT PCR experiments for the pro-apoptotic, anti-apoptotic and cell cycle arrest genes**

| Gene Symbol        | Target Gene Product                                    | Primer sequence 5'-3'                                 |
|--------------------|--------------------------------------------------------|-------------------------------------------------------|
| <i>AEN</i>         | Apoptosis enhancing nuclease                           | F-CTTCCAGGCGCTCAAGTATGT<br>R-GGGCCAGGTCCTTTAGAGAGA    |
| <i>BAX</i>         | BCL-2 associated X protein                             | F-CCCGAGAGGTCTTTTTCCGAG<br>R-CCAGCCCATGATGGTTCTGAT    |
| <i>BBC3 (PUMA)</i> | BCL2 binding component 3                               | F-GCCAGATTTGTGAGACAAGAGG<br>R-CAGGCACCTAATTGGGCTC     |
| <i>TNFRSF10B</i>   | Tumor necrosis factor receptor superfamily, member 10b | F-ATGGAACAACGGGGACAGAAC<br>R-CTGCTGGGGAGCTAGGTCT      |
| <i>TP53INP1</i>    | Tumor protein p53 inducible nuclear protein 1          | F-TCTTGAGTGCTTGCTGATACA<br>R-GGTGGGGTGATAAACAGCTC     |
| <i>MDM2</i>        | Mouse double minute 2 homolog                          | F-AGTAGCAGTGAATCTACAGGGA<br>R-CTGATCCAACCAATCACCTGAAT |
| <i>BCL-2</i>       | B-Cell CLL/Lymphoma 2                                  | F-GGTGGGGTCATGTGTGTGG<br>R-CGGTTCAGGTACTCAGTCATCC     |
| <i>BIRC5</i>       | Baculoviral IAP Repeat-Containing 5                    | F-AGGACCACCGCATCTCTACAT<br>R-AAGTCTGGCTCGTTCTCAGTG    |
| <i>MCL-1</i>       | Myeloid Cell Leukemia 1                                | F-GTGCCTTTGTGGCTAAACACT<br>R-AGTCCCGTTTTGTCCCTACGA    |
| <i>CDKN1A</i>      | Cyclin-dependent kinase inhibitor 1A (p21, Cip1)       | F-TGTCCGTCAGAACCCATGC<br>R-AAAGTCGAAGTTCATCGCTC       |
| <i>SESN1</i>       | Sestrin 1                                              | F-TGCTTTGGGCCGTTTGGATAA<br>R-TGTAGTGACGATAATGTAGGGGT  |
| <i>GADD45A</i>     | Growth Arrest And DNA-Damage-Inducible                 | F-GAGAGCAGAAGACCGAAAGGA<br>R-CAGTGATCGTGCGCTGACT      |

**Supplementary Table S2: The primers and their sequences used for qRT PCR experiments for DNA repair genes implicated in the repair of cisplatin-induced DNA damage**

| Gene Symbol    | Target Gene Product                                                                   | Primer sequence 5'-3'                                |
|----------------|---------------------------------------------------------------------------------------|------------------------------------------------------|
| <i>DDB2</i>    | Damage-specific DNA binding protein2                                                  | F-ACCTCCGAGATTGTATTACGCC<br>R-TCACATCTTCTGGTAGGAC    |
| <i>ERCC1</i>   | Excision repair cross-complementing rodent repair deficiency, complementation group 1 | F-CTACGCCGAATATGCCATCTC<br>R-GTACGGGATTGCCCTCTG      |
| <i>MLH1</i>    | MutL homolog 1, colon cancer, nonpolyposis type 2 (E. coli)                           | F-GCAAACCCCTGTCCAGTCAG<br>R-CTGGGAGTTCAAGCATCTCCT    |
| <i>MSH2</i>    | mutS homolog 2, colon cancer, nonpolyposis type 1 (E. coli)                           | F-CACTGTCTGCGGTAATCAAGT<br>R-CTCTGACTGCTGCAATATCCAAT |
| <i>RAD51</i>   | RAD51 homolog (S. cerevisiae)                                                         | F-CAACCCATTTACGGTTAGAGC<br>R-TTCTTTGGCGCATAGGCAACA   |
| <i>RRM2B</i>   | Ribonucleotide reductase M2B (TP53 inducible)                                         | F-ATTGGGCCTTGCGATGGATAG<br>R-GAGTCCTGGCATAAGACCTCT   |
| <i>TP53BP1</i> | Tumor protein p53 binding protein 1                                                   | F-TGAGCAGTTACCTCAGCCAAA<br>R-AAGGGAATGTGTAGTATTGCCTG |
| <i>XPC</i>     | xeroderma pigmentosum, complementation group C                                        | F-CATCGTGGGAGCCATCGTAAG<br>R-CTCACCATCGCTGCACATTTT   |
